# Supplementary material for: Hearing loss and cognitive decline among older adults with atrial fibrillation: the SAGE-AF study
Source: PubMed Central journal article supplement — J Geriatr Cardiol. 2020 Apr;17(4):177–83. doi: 10.11909/j.issn.1671-5411.2020.04.002 (PMC7189266; doi:10.11909/j.issn.1671-5411.2020.04.002), 2020-04
Supplement: jgc-17-04-177-s001.pdf [file jgc-17-04-177-s001.pdf]

## Supplementary Tables

**Table 1S. Association between hearing loss despite of hearing aid\* and prevalent cognitive impairment at baseline.**

| Hearing loss          | Prevalence of cognition decline | OR (95% CI)      |                  |                  |
|-----------------------|---------------------------------|------------------|------------------|------------------|
|                       |                                 | Model 1          | Model 2          | Model 3          |
| Yes ( <i>n</i> = 358) | 179 (50.0%)                     | 1.32 (1.00–1.75) | 1.31 (0.99–1.75) | 1.31 (0.98–1.74) |
| No ( <i>n</i> = 886)  | 349 (39.4%)                     | Reference        |                  |                  |

\*Hearing loss was defined by the criteria not including the use of hearing aid. Model 1: adjusted for hearing aid age, sex, race, and education. Model 2: adjusted for variables in Model 1 plus diabetes, hypertension, and stroke. Model 3: adjusted for variables in Model 2 plus anticoagulation. CI: confidence interval; OR: odds ratio.

**Table 2S. Association between hearing loss despite of hearing aid\* and incident cognitive impairment at one year.**

| Hearing loss          | Prevalence of cognition decline | OR (95% CI)      |                  |                  |
|-----------------------|---------------------------------|------------------|------------------|------------------|
|                       |                                 | Model 1          | Model 2          | Model 3          |
| Yes ( <i>n</i> = 166) | 36 (21.7%)                      | 1.64 (1.03–2.61) | 1.63 (1.02–2.60) | 1.63 (1.02–2.60) |
| No ( <i>n</i> = 496)  | 70 (14.1%)                      | Reference        |                  |                  |

\*Hearing loss was defined by the criteria not including the use of hearing aid. Model 1: adjusted for hearing aid age, sex, race, and education. Model 2: adjusted for variables in Model 1 plus diabetes, hypertension, and stroke. Model 3: adjusted for variables in Model 2 plus anticoagulation. CI: confidence interval; OR: odds ratio.

**Table 3S. Association between hearing loss and prevalent cognitive impairment by Montreal Cognitive Assessment Battery auditory scoring\*.**

| Hearing loss          | Prevalence of cognition impairment | OR (95% CI)      |                  |                  |                  |
|-----------------------|------------------------------------|------------------|------------------|------------------|------------------|
|                       |                                    | Unadjusted       | Model 1          | Model 2          | Model 3          |
| Yes ( <i>n</i> = 451) | 210 (47%)                          | 1.40 (1.11–1.77) | 1.15 (0.88–1.50) | 1.14 (0.87–1.49) | 1.13 (0.87–1.48) |
| No ( <i>n</i> = 793)  | 304 (38%)                          | Reference        |                  |                  |                  |

\*Auditory scoring: three Montreal Cognitive Assessment Battery items rely heavily on hearing: language repetition (2 points), attention to letters (1 point), and digit span (2 points). All three are removed, with the maximum score becoming 25, and the revised cutoff score for a “normal” score becoming 23\*25/30 = 19.2, (need 20 to pass)<sup>[17,18]</sup>. Model 1: adjusted for age, sex, race, and education. Model 2: adjusted for variables in Model 1 plus diabetes, hypertension, and stroke. Model 3: adjusted for variables in Model 2 plus anticoagulation. CI: confidence interval; OR: odds ratio.

**Table 4S. Association between hearing loss and incident cognitive impairment by Montreal Cognitive Assessment Battery auditory scoring\*.**

| Hearing loss          | Incidence of cognition impairment | OR (95% CI)      |                  |                  |                  |
|-----------------------|-----------------------------------|------------------|------------------|------------------|------------------|
|                       |                                   | Unadjusted       | Model 1          | Model 2          | Model 3          |
| Yes ( <i>n</i> = 187) | 41 (22%)                          | 1.50 (0.97–2.32) | 1.50 (0.95–2.35) | 1.53 (0.97–2.40) | 1.53 (0.97–2.40) |
| No ( <i>n</i> = 425)  | 67 (16%)                          | Reference        |                  |                  |                  |

\*Auditory scoring: three Montreal Cognitive Assessment Battery items rely heavily on hearing: language repetition (2 points), attention to letters (1 point), and digit span (2 points). All three are removed, with the maximum score becoming 25, and the revised cutoff score for a “normal” score becoming 23\*25/30 = 19.2, (need 20 to pass)<sup>[17,18]</sup>. Model 1: adjusted for age, sex, race, and education. Model 2: adjusted for variables in Model 1 plus diabetes, hypertension, and stroke. Model 3: adjusted for variables in Model 2 plus anticoagulation. CI: confidence interval; OR: odds ratio.
